# Supplementary material for: A graph neural network model for inferring interindividual variation from experimental biological data
Source: Research Square preprint supplement (doi:10.21203/rs.3.rs-7239284/v1), 2025-08-07
Supplement: Supplementary file 2 [file 8ea67fd12b39013b92568105.xlsx]

## Sheet: model frequency
model_main	count
exercise	3953
high-fat diet feeding	1456
sarcopenia	710
aging	528
muscle injury	515
electrical stimulation	457
type 2 diabetes	322
duchenne muscular dystrophy	281
diabetes	275
isometric contraction	252
obesity	245
cancer cachexia	215
denervation	198
hindlimb ischemia	196
myogenic differentiation	181
differentiation	166
caloric restriction	161
dexamethasone treatment	153
chronic kidney disease	152
walking	151
transcranial magnetic stimulation	140
spinal cord injury	140
dystrophin deficiency	138
muscle contraction	133
chemotherapy	127
hypoxia	126
hindlimb unloading	122
muscular dystrophy	118
insulin stimulation	118
sepsis	118
hindlimb suspension	115
oxidative stress	109
heart failure	108
physical activity	107
covid-19	99
strength training	98
copd	98
surgery	97
cardiotoxin injection	96
insulin resistance	95
myocardial infarction	94
fasting	93
gene therapy	90
high-intensity interval training	88
volumetric muscle loss	84
chronic obstructive pulmonary disease	81
sarcopenic obesity	78
functional electrical stimulation	78
immobilization	77
age	74
bed rest	73
muscle biopsy	73
stroke	72
dux4 expression	71
dissection	69
myogenesis	69
heat stress	68
ischemia-reperfusion	68
surgical excision	68
glucocorticoid treatment	67
cold exposure	67
insulin treatment	66
hyperinsulinemic-euglycemic clamp	64
ovariectomy	63
palmitate treatment	63
insulin infusion	63
aerobic exercise	61
fatigue	60
creatine supplementation	60
rna sequencing	60
gene transfer	59
mutation	57
rheumatoid arthritis	57
cardiotoxin injury	57
doxorubicin treatment	57
metformin treatment	57
burn injury	57
chronic heart failure	56
eccentric contractions	56
eccentric contraction	56
ischemia	56
hemodialysis	54
femoral artery ligation	53
treadmill exercise	52
cerebral palsy	52
surgical resection	51
running	50
simvastatin treatment	50
sarcopenia diagnosis	50
vitamin d supplementation	49
myostatin inhibition	49
sciatic nerve transection	49
knee osteoarthritis	48
cachexia	47
sarcopenia assessment	47
type 1 diabetes	46
hibernation	46
cigarette smoke exposure	46
critical illness	46
cell transplantation	45
rehabilitation	44
cycling	44
enzyme replacement therapy	44
anatomical dissection	44
stretch	43
pompe disease	43
volumetric muscle loss injury	43
mutation analysis	43
colorectal cancer	43
transfection	43
nerve stimulation	43
age comparison	42
myostatin knockout	42
metabolic syndrome	42
muscle regeneration	41
pancreatic cancer	41
aicar treatment	40
malignant hyperthermia	40
oral glucose tolerance test	40
lipid infusion	40
myoblast differentiation	40
myasthenia gravis	40
muscle fatigue	39
liver cirrhosis	39
protein intake	39
ultrasound imaging	39
dietary protein intake	39
exon skipping	39
botulinum toxin injection	39
ctx injection	39
testosterone treatment	38
genome-wide association study	38
mechanical overload	38
bariatric surgery	38
static stretching	37
bioelectrical impedance analysis	37
rotator cuff tear	37
peripheral artery disease	37
high-fat diet feeding and streptozotocin	37
amyotrophic lateral sclerosis	37
ketogenic diet	36
mechanical ventilation	36
gene expression analysis	36
myotonic dystrophy	36
chronic liver disease	36
ctx injury	36
gait analysis	35
body composition assessment	35
breast cancer	35
facioscapulohumeral muscular dystrophy	35
protein supplementation	34
genetic mutation	34
plantar flexion exercise	34
ischemia/reperfusion	34
starvation	34
nerve injury	34
total hip arthroplasty	34
als	33
cirrhosis	33
cancer	33
immunohistochemistry	33
myoblast transplantation	32
pgc-1α overexpression	32
dietary supplementation	32
myotonic dystrophy type 1	32
rna-seq	32
hindlimb immobilization	31
statin treatment	31
lung cancer	31
voluntary contraction	31
neoadjuvant chemotherapy	31
liver transplantation	31
t. cruzi infection	31
voluntary wheel running	30
ampk activation	30
electrical pulse stimulation	30
mechanical stimulation	30
pyomyositis	30
hypertension	30
covid-19 infection	30
stretching	29
locomotion	29
spinal muscular atrophy	29
optogenetic stimulation	29
resveratrol treatment	29
hip fracture	29
ischemia-reperfusion injury	29
electroporation	29
aerobic training	28
vibration	28
inflammation	28
vitamin d deficiency	28
sprint interval training	28
weight loss	28
parkinson's disease	28
insulin	28
sars-cov-2 infection	28
downhill running	27
acute exercise	27
perturbation	27
cisplatin treatment	27
tnf-α treatment	27
leucine supplementation	27
cell culture	27
skeletal muscle injury	27
rhabdomyolysis	27
gestational diabetes	27
rhabdomyosarcoma	27
ca2+ activation	27
development	27
angiotensin ii infusion	26
synergist ablation	26
spinal cord transection	26
sma	26
bmal1 knockout	26
genetic analysis	26
huntington's disease	26
dermatomyositis	26
surgical treatment	26
femoral artery occlusion	25
peripheral arterial disease	25
acl reconstruction	25
functional overload	25
microgravity	25
maternal obesity	25
mri	25
myoblast fusion	25
radiotherapy	24
osteoarthritis	24
dietary nitrate supplementation	24
surgical intervention	24
nutritional intervention	24
muscle stimulation	24
mechanical loading	24
anatomical variation	24
idiopathic inflammatory myopathies	24
intramuscular injection	24
exercise intervention	23
pregnancy	23
whole-body vibration	23
hyperglycemia	23
low back pain	23
treadmill walking	23
dietary intervention	23
heart failure with preserved ejection fraction	23
caffeine treatment	23
mstn knockout	23
chronic low back pain	23
ct imaging	23
voltage clamp	23
transplantation	23
developmental stages	23
bone marrow transplantation	23
lps treatment	23
sarcopenia screening	23
transgenic mice	23
gne myopathy	23
high-intensity interval exercise	22
exhaustive exercise	22
hmb supplementation	22
diet	22
nafld	22
dysferlin deficiency	22
blood flow restriction training	22
intermittent hypoxia	22
muscle atrophy	22
temperature	22
intrauterine growth restriction	22
sciatic nerve injury	22
muscle metaboreflex activation	21
statin therapy	21
blood flow restriction	21
lower body negative pressure	21
ultrasonography	21
exercise-induced muscle damage	21
feeding	21
hiv infection	21
total knee arthroplasty	21
isokinetic testing	21
body composition analysis	21
cold acclimation	21
gastric cancer	21
calcium activation	21
treadmill running	20
spaceflight	20
ischemic preconditioning	20
maximal voluntary contraction	20
atorvastatin treatment	20
osteoporosis	20
chemoradiotherapy	20
computed tomography	20
low-protein diet	20
prv infection	20
mutagenesis	20
alternative splicing	20
mtdna mutation	20
co-culture	20
becker muscular dystrophy	20
dynamic exercise	19
isometric contractions	19
non-alcoholic fatty liver disease	19
h2o2 treatment	19
walking and running	19
pioglitazone treatment	19
pressure overload	19
gait	19
myosteatosis	19
myod expression	19
hyperinsulinemia	19
myostatin deficiency	19
trypanosoma cruzi infection	19
phosphorylation	19
agrin treatment	19
gene delivery	19
ryr1 mutation	19
androgen deprivation therapy	18
handgrip exercise	18
growth hormone treatment	18
hopping	18
rapamycin treatment	18
kidney transplantation	18
fictive locomotion	18
inclusion body myositis	18
muscle activation	18
irradiation	18
inflammatory bowel disease	18
dry needling	18
c26 tumor	18
sod1 mutation	18
nitrate supplementation	18
nerve repair	18
paired associative stimulation	18
gastrectomy	18
glycerol injection	18
nonalcoholic fatty liver disease	18
nebulin knockout	18
idiopathic inflammatory myopathy	18
ultrasound measurement	17
hypothyroidism	17
insulin injection	17
lps injection	17
multiple sclerosis	17
lengthening contractions	17
anterior cruciate ligament reconstruction	17
thyroid hormone treatment	17
nerve crush	17
mri imaging	17
whole-exome sequencing	17
oral administration	17
cryoinjury	17
diffusion tensor imaging	17
high glucose	17
sorafenib treatment	17
igf-1 treatment	17
ca2+ binding	17
myostatin treatment	17
renal cell carcinoma	17
igf-i treatment	16
irisin treatment	16
eccentric training	16
training	16
high intensity interval training	16
temperature change	16
cardiopulmonary exercise testing	16
dystrophinopathy	16
sciatic nerve crush	16
genetic variation	16
muscle overload	16
critical limb ischemia	16
collagen-induced arthritis	16
action observation	16
acute muscle injury	16
muscle development	16
gdf11 treatment	16
sirna knockdown	16
calcium release	16
pre-diabetes	16
amino acid infusion	16
adipogenic differentiation	16
actin polymerization	16
endotoxemia	16
sod1g93a	16
decellularization	16
crohn's disease	16
botulinum toxin treatment	16
sedentary behavior	15
magnetic resonance imaging	15
isometric exercise	15
low muscle mass	15
high-fructose diet feeding	15
hypokalemic periodic paralysis	15
hyperinsulinemic euglycemic clamp	15
kinesio taping	15
disuse	15
protein ingestion	15
frailty	15
lmna mutation	15
hyperhomocysteinemia	15
dex treatment	15
bcaa supplementation	15
nerve transfer	15
depolarization	15
palmitic acid treatment	15
experimental autoimmune myasthenia gravis	15
genetic polymorphism	15
ca2+ release	15
arsenic exposure	15
sod1g93a mutation	15
pancreatic ductal adenocarcinoma	15
infection	15
cervical spinal cord injury	15
targeted muscle reinnervation	15
motor imagery	15
fatiguing exercise	14
voluntary exercise	14
exercise testing	14
surgical repair	14
muscle stretch	14
chronic stroke	14
mcardle disease	14
whey protein supplementation	14
hyperthermia	14
contractile activity	14
mechanical stretch	14
streptozotocin injection	14
chronic inflammation	14
mitochondrial isolation	14
body composition	14
tissue engineering	14
low skeletal muscle mass	14
hind limb suspension	14
dietary restriction	14
lewis lung carcinoma	14
obstructive sleep apnea	14
hyperammonemia	14
injury	14
single-cell rna sequencing	14
dysferlinopathy	14
myod knockout	14
gene editing	14
hind-limb ischemia	14
t. spiralis infection	14
wheel running	13
treadmill training	13
isometric handgrip exercise	13
hepatocellular carcinoma	13
exercise pressor reflex	13
cold pressor test	13
passive stretching	13
alzheimer's disease	13
mental stress	13
β-alanine supplementation	13
polymyositis	13
il-6 treatment	13
dehydration	13
systemic hypoxia	13
dapagliflozin treatment	13
physical exercise	13
acl injury	13
hydrogen peroxide treatment	13
clenbuterol treatment	13
anatomical study	13
genetic selection	13
electrical impedance myography	13
l-carnitine supplementation	13
coculture	13
roux-en-y gastric bypass	13
western diet feeding	13
neoadjuvant chemoradiotherapy	13
freeze injury	13
botulinum toxin a injection	13
dystrophy	13
aav delivery	13
rem sleep behavior disorder	13
polycystic ovary syndrome	13
caffeine	13
dystrophin mutation	13
biopsy	13
crossbreeding	13
gene knockout	13
dna vaccination	13
trichinella spiralis infection	13
cytokine treatment	13
myositis	13
gene expression	13
cast immobilization	13
fshd	13
x-ray diffraction	13
marathon running	12
myostatin mutation	12
exercise therapy	12
postural perturbation	12
high-frequency electrical stimulation	12
contraction	12
whole body vibration	12
bench press	12
plyometric training	12
foam rolling	12
ischaemia	12
lengthening contraction	12
chronic hypoxia	12
vitamin d treatment	12
high-intensity intermittent exercise	12
5/6 nephrectomy	12
halothane exposure	12
sedentary lifestyle	12
genetic association study	12
hip osteoarthritis	12
bont-a injection	12
mdx mouse model	12
hdac inhibition	12
shear wave elastography	12
chronic ankle instability	12
immobilisation	12
rna interference	12
icu admission	12
prv-1 infection	12
scn4a mutation	12
rotator cuff repair	12
myod overexpression	12
tumor implantation	12
fenofibrate treatment	12
toxoplasma gondii infection	12
hyperthyroidism	12
non-small cell lung cancer	12
myotonia congenita	12
calcium binding	12
genetic testing	12
aav vector administration	12
juvenile dermatomyositis	12
sbma	12
leptin treatment	12
aav treatment	12
embryonic development	12
ultrasound	12
immune-mediated necrotizing myopathy	12
diabetic muscle infarction	12
curcumin supplementation	11
desmin knockout	11
muscle contractions	11
hypoxic exercise	11
cryotherapy	11
mri assessment	11
tnfα treatment	11
m6a modification	11
overload	11
cold stress	11
melatonin treatment	11
chronic contractile activity	11
nemaline myopathy	11
maintenance hemodialysis	11
mitochondrial dysfunction	11
iron deficiency	11
double knockout	11
insulin administration	11
hypercapnia	11
cardiac surgery	11
exome sequencing	11
leucine treatment	11
lipopolysaccharide treatment	11
crispr/cas9 gene editing	11
snp analysis	11
hypertrophy	11
colon cancer	11
sod1 knockout	11
gene expression profiling	11
actin binding	11
myoelectric control	11
dietary pattern	11
tenotomy	11
notch signaling	11
whole exome sequencing	11
ev71 infection	11
adiponectin treatment	11
dry immersion	11
esophagectomy	11
force production	11
galvanic vestibular stimulation	11
cysticercosis	11
muscle architecture analysis	11
tendon transfer	11
surgical reconstruction	11
radiofrequency ablation	11
submaximal exercise	10
walking speed	10
beta-alanine supplementation	10
nutrient deprivation	10
contusion injury	10
transverse aortic constriction	10
nutritional assessment	10
high-fat high-sucrose diet feeding	10
high intensity exercise	10
amino acid supplementation	10
nutritional supplementation	10
sprint exercise	10
semaglutide treatment	10
acute myocardial infarction	10
cycling exercise	10
transcranial direct current stimulation	10
voluntary running	10
oxidative phosphorylation	10
genetic association	10
pulmonary arterial hypertension	10
reactive hyperemia	10
genotyping	10
time-restricted feeding	10
cold water immersion	10
caffeine supplementation	10
tgf-β1 treatment	10
myostatin deletion	10
dexamethasone	10
unilateral lower limb suspension	10
probiotic supplementation	10
lactate administration	10
mitochondrial myopathy	10
cell isolation	10
hypertonic saline injection	10
ischemia reperfusion	10
dna methylation analysis	10
mechanical perturbation	10
diet-induced obesity	10
malnutrition	10
aav gene therapy	10
cardiopulmonary bypass	10
malignant hyperthermia susceptibility	10
curcumin treatment	10
coronary artery disease	10
covid-19 pandemic	10
sarcopenia prediction	10
simulated microgravity	10
cross-linking	10
insulin sensitivity	10
spastic cerebral palsy	10
acute ischemic stroke	10
neuromuscular disorders	10
3d bioprinting	10
genetic variant	10
circadian rhythm	10
corticosterone treatment	10
cell sorting	10
acta1 mutation	10
crush injury	10
mercury exposure	10
s-ibm	10
leucine infusion	10
corticosteroid treatment	10
high-frequency stimulation	10
vitamin d status	10
muscle paralysis	10
acute compartment syndrome	10
placental insufficiency	10
fatty acid treatment	10
cryogenic electron microscopy	10
ischemic injury	10
dietary inflammatory index	10
ischemia/reperfusion injury	10
muscle contusion	10
frailty assessment	10
head and neck cancer	10
testosterone therapy	9
atp infusion	9
cold-water immersion	9
weight loss intervention	9
whole-body vibration training	9
blood flow restriction exercise	9
whole-body electromyostimulation	9
antioxidant supplementation	9
testosterone replacement therapy	9
myopathy	9
magnetic resonance spectroscopy	9
bupivacaine injection	9
knee-extensor exercise	9
intense exercise	9
static contraction	9
carbohydrate ingestion	9
high-protein diet	9
intraspinal microstimulation	9
castration	9
passive leg movement	9
oxidation	9
magnetic resonance elastography	9
temperature acclimation	9
mtdna mutations	9
food deprivation	9
fecal microbiota transplantation	9
fish oil supplementation	9
rnai knockdown	9
deep learning segmentation	9
carnitine supplementation	9
alcohol consumption	9
transcutaneous spinal cord stimulation	9
mtdna deletion	9
acute injury	9
peripheral nerve injury	9
high altitude exposure	9
ultrasound assessment	9
doxycycline treatment	9
septic shock	9
thermal stress	9
immune checkpoint inhibitor therapy	9
acute lung injury	9
isometric elbow flexion	9
sodium channel mutation	9
isometric plantarflexion	9
chronic spinal cord injury	9
dexamethasone-induced muscle atrophy	9
systemic inflammation	9
quercetin treatment	9
arterial occlusion	9
rna-seq analysis	9
tail suspension	9
glutamine supplementation	9
musculoskeletal modeling	9
hgf treatment	9
sibm	9
losartan treatment	9
myotonic dystrophy type 2	9
sleep deprivation	9
limb ischemia	9
agrin stimulation	9
crystallization	9
fibromyalgia	9
tk2 deficiency	9
mutation screening	9
site-directed mutagenesis	9
residual feed intake	9
retinoic acid treatment	9
transgenic expression	9
dystrophic muscle	9
osmotic stress	9
pmo treatment	9
inorganic phosphate	9
androgen treatment	9
ross river virus infection	9
overexpression	9
pitx2 knockout	9
inflammatory myopathy	9
molecular dynamics simulation	9
t. gondii infection	9
ryr1 mutations	9
postnatal development	9
breed comparison	9
age-related changes	9
trauma	9
dantrolene treatment	9
immune checkpoint inhibitors	9
ovarian cancer	9
peritoneal dialysis	9
wheelchair propulsion	9
functional neuromuscular stimulation	9
metastasis	9
tuberculosis	9
transarterial chemoembolization	9
muscle strength	8
swim training	8
resistive training	8
hyperinsulinaemic-euglycaemic clamp	8
calsequestrin knockout	8
menstrual cycle	8
western diet	8
rehabilitation program	8
n-3 pufa supplementation	8
sarcoidosis	8
proteasome inhibition	8
incremental exercise	8
magnesium supplementation	8
cardiac rehabilitation	8
motor nerve stimulation	8
selective breeding	8
physical inactivity	8
physiotherapy	8
katp channel inhibition	8
dmd mutation	8
knee flexion	8
static handgrip exercise	8
glp-1 infusion	8
testosterone administration	8
countermovement jump	8
protein feeding	8
omega-3 supplementation	8
isokinetic strength testing	8
isometric knee extension	8
heat exposure	8
ectopic expression	8
sulforaphane treatment	8
heat shock	8
nnos knockout	8
tumor growth	8
hormone replacement therapy	8
spinal and bulbar muscular atrophy	8
il-6 overexpression	8
high-salt diet	8
disuse atrophy	8
chronic intermittent hypoxia	8
probiotic treatment	8
advanced cancer	8
high-fat high-sucrose diet	8
temperature jump	8
acidosis	8
hamstring injury	8
sleep duration	8
acute pancreatitis	8
sciatic denervation	8
senolytic treatment	8
intermittent fasting	8
haemodialysis	8
ckd	8
n-acetylcysteine treatment	8
cystic fibrosis	8
jumping	8
vcp mutation	8
erα knockout	8
liraglutide treatment	8
bioimpedance analysis	8
p53 knockout	8
low protein diet	8
osteosarcopenia	8
prednisolone treatment	8
endotoxin administration	8
capsaicin treatment	8
chikv infection	8
fasting-refeeding	8
myofibrillogenesis	8
tumor-bearing	8
17β-estradiol treatment	8
cdna cloning	8
transcriptome analysis	8
exosome treatment	8
gene targeting	8
protein interaction	8
oleic acid treatment	8
golden retriever muscular dystrophy	8
action potential stimulation	8
acromegaly	8
tgf-β treatment	8
actomyosin interaction	8
m.3243a>g mutation	8
scaffold implantation	8
aav injection	8
tamoxifen treatment	8
serum starvation	8
skeletal myogenic differentiation	8
subcutaneous implantation	8
diffuse large b-cell lymphoma	8
palmitate exposure	8
nebulin mutation	8
cardiovascular disease	8
xenotransplantation	8
growth	8
mstn mutation	8
fructose feeding	8
muscle denervation	8
lps stimulation	8
dnajb6 mutation	8
dux4 overexpression	8
glucose infusion	8
anatomical examination	8
sciatic nerve crush injury	8
muscle dissection	8
notch inhibition	8
acute-on-chronic liver failure	8
hormone therapy	8
tgfβ treatment	8
sodium channel blockade	8
neuromuscular disease	8
heterochronic parabiosis	8
lenvatinib treatment	8
diabetic myonecrosis	8
myoblast isolation	8
deep brain stimulation	8
focal myositis	8
musculoskeletal model	8
precision grip task	8
cadaver dissection	8
isometric force production	8
cadaveric dissection	8
calcific myonecrosis	8
transcutaneous spinal stimulation	8
diet quality	8
high-altitude exposure	7
spinal transection	7
nos inhibition	7
patellofemoral pain	7
low-intensity exercise	7
heart failure with reduced ejection fraction	7
nordic walking	7
caffeine ingestion	7
partial denervation	7
er stress	7
crouch gait	7
maximal exercise	7
gastric bypass surgery	7
scoliosis	7
repetitive transcranial magnetic stimulation	7
pparδ activation	7
h-reflex conditioning	7
massage	7
sildenafil treatment	7
cardiopulmonary exercise test	7
vitamin d3 supplementation	7
muscle damage	7
epo treatment	7
radiation therapy	7
neuromuscular training	7
overfeeding	7
isokinetic strength assessment	7
osmotic shock	7
nutrition	7
heart transplantation	7
temperature increase	7
adolescent idiopathic scoliosis	7
unilateral ureteral obstruction	7
nociceptive stimulation	7
beetroot juice supplementation	7
dystrophin knockout	7
actn3 r577x polymorphism	7
stac3 knockout	7
tnf treatment	7
antibiotic treatment	7
handgrip strength	7
ankle dorsiflexion	7
photobiomodulation therapy	7
electrical stimulation training	7
nerve transection and repair	7
ischemic stroke	7
nicotinamide riboside supplementation	7
vibratory stimulation	7
x-linked myotubular myopathy	7
concurrent training	7
traumatic brain injury	7
energy restriction	7
β-adrenergic stimulation	7
sporadic inclusion body myositis	7
dynamic stretching	7
maximum voluntary isometric contraction	7
myofiber isolation	7
cardiovascular surgery	7
middle cerebral artery occlusion	7
angiotensin ii treatment	7
maternal exercise	7
glucose stimulation	7
ifn-γ treatment	7
immunotherapy	7
atp application	7
dna methylation	7
first-line chemotherapy	7
undernutrition	7
dux4 induction	7
pax7 knockout	7
crispr/cas9 genome editing	7
dnm2 mutation	7
chronic binge alcohol	7
standing	7
c26 adenocarcinoma	7
hospitalization	7
reaching task	7
fatiguing contractions	7
chronic alcohol consumption	7
mutant sod1	7
microarray analysis	7
isoproterenol treatment	7
myod induction	7
yeast two-hybrid	7
insulin receptor knockout	7
experimental autoimmune myositis	7
lactation	7
myotoxic injury	7
methylprednisolone treatment	7
mtm1 knockout	7
sarcocystis infection	7
calpain inhibition	7
hyperinsulinemic clamp	7
cell therapy	7
cysteine mutagenesis	7
action potential	7
myofascial pain syndrome	7
myotoxin injury	7
calcineurin inhibition	7
radical cystectomy	7
fhl1 mutation	7
stretch activation	7
sodium channel mutations	7
nf-κb inhibition	7
aav-mediated gene transfer	7
voltage-clamp	7
cardiotoxin-induced injury	7
actin-myosin interaction	7
dietary intake	7
gluteal muscle contracture	7
ghrelin infusion	7
rna toxicity	7
recombinant protein expression	7
fgf2 treatment	7
stress	7
snp association	7
icu-acquired weakness	7
neoadjuvant therapy	7
transient transfection	7
thermal challenge	7
passive stretch	7
surgical procedure	7
knockout	7
ang ii infusion	7
tirasemtiv treatment	7
hindlimb ischaemia	7
tourniquet application	7
sciatic nerve denervation	7
hind limb unloading	7
gsk3β inhibition	7
intracortical microstimulation	7
compression	7
skeletal muscle contusion	7
mediterranean diet adherence	7
atra treatment	7
feed efficiency	7
aav gene transfer	7
cpt1b knockout	7
sglt2 inhibitor treatment	7
cav1.1 knockout	7
burn trauma	7
dietary treatment	7
dialysis	7
d3-creatine dilution	7
ethanol treatment	7
compartment syndrome	7
muscle disease	7
mirna regulation	7
hybridization	7
acute kidney injury	7
isometric voluntary contraction	7
actn3 genotype	7
motor neuron disease	7
gsk3 inhibition	7
huntington disease	7
systemic lupus erythematosus	7
ctg repeat expansion	7
smn deficiency	7
isometric force generation	7
tendon vibration	7
grasping	7
postural control	7
mexiletine treatment	7
hepatectomy	7
muscle reconstruction	7
essential tremor	7
distal radius fracture	7
physical activity intervention	6
carbohydrate intake	6
low-level laser therapy	6
bicycle exercise	6
dorsiflexion	6
spinal cord stimulation	6
electric pulse stimulation	6
sprint performance	6
muscle vibration	6
il-6 infusion	6
quiet standing	6
chronic low-frequency stimulation	6
diet-induced weight loss	6
dynamic leg exercise	6
squat	6
hypergravity	6
cooling	6
heat acclimation	6
isometric strength assessment	6
oral glucose load	6
hypoxic training	6
resveratrol supplementation	6
voluntary contractions	6
adrenergic stimulation	6
incomplete spinal cord injury	6
strenuous exercise	6
microdialysis	6
achilles tendon rupture	6
vascular occlusion	6
hyperoxia	6
caffeine administration	6
sprinting	6
il-15 treatment	6
functional electrical stimulation cycling	6
weight lifting	6
orai1 knockout	6
estradiol treatment	6
sleeve gastrectomy	6
forced swimming	6
mtor inhibition	6
unloading	6
laminin-111 treatment	6
drop jump	6
nerve transection	6
obesity and type 2 diabetes	6
insulin clamp	6
nav1.4 mutation	6
mechanical stress	6
sglt2 inhibition	6
(竏・-epicatechin treatment	6
football training	6
fontan circulation	6
mcu knockout	6
bedrest	6
passive movement	6
botulinum toxin type a injection	6
d-galactose treatment	6
mirna profiling	6
coronary heart disease	6
pm2.5 exposure	6
isometric training	6
dietary nitrate intake	6
muscle fiber analysis	6
l-citrulline supplementation	6
balance perturbation	6
alcohol	6
squat exercise	6
calcitriol treatment	6
sirt1 knockout	6
maximal strength training	6
prolonged sitting	6
shear stress	6
nrf2 knockout	6
egcg treatment	6
stim1 knockout	6
weight change	6
comparison of pig breeds	6
anoxia	6
tetanic stimulation	6
autophagy inhibition	6
ampk knockout	6
exertional heat stroke	6
drug treatment	6
tumor	6
lumbar disc herniation	6
nutritional support	6
bmi	6
levodopa treatment	6
genetic variants	6
feed restriction	6
ccl4 treatment	6
dicer knockout	6
idiopathic pulmonary fibrosis	6
stress urinary incontinence	6
stretch-shortening cycle	6
gene mutation	6
genomic selection	6
satellite cell transplantation	6
fkrp mutation	6
growth factor treatment	6
birth weight	6
bexarotene treatment	6
myostatin	6
orchiectomy	6
metabolic dysfunction-associated steatotic liver disease	6
burn	6
maximal voluntary isometric contraction	6
selenium supplementation	6
statin use	6
paclitaxel treatment	6
lidocaine treatment	6
bmp4 treatment	6
trichinella infection	6
cell fusion	6
3d culture	6
myofibrillar myopathy	6
temperature variation	6
store-operated ca2+ entry	6
igf-1 overexpression	6
atp hydrolysis	6
myosin binding	6
rlc exchange	6
myotoxin injection	6
experimental autoimmune encephalomyelitis	6
nucleotide binding	6
lipotoxicity	6
lmna knockout	6
postnatal growth	6
vegf treatment	6
alcohol feeding	6
cigarette smoking	6
m6a methylation	6
satellite cell isolation	6
igf1 treatment	6
ca2+ signaling	6
cdna transfection	6
myh7 mutation	6
callipyge mutation	6
cyclic stretch	6
proteolysis-inducing factor	6
selenium deficiency	6
ionizing radiation	6
limb regeneration	6
mmp inhibition	6
serum deprivation	6
leptin injection	6
notexin injury	6
chikungunya virus infection	6
insulin sensitivity assessment	6
s100a1 knockout	6
mtdna deletions	6
streptozotocin treatment	6
dxa measurement	6
p38 inhibition	6
high-throughput screening	6
gene duplication	6
acid injection	6
islet transplantation	6
limb immobilization	6
adp-ribosylation	6
high glucose exposure	6
mendelian randomization	6
prednisone treatment	6
rotenone treatment	6
calcium concentration	6
olanzapine treatment	6
hip arthroplasty	6
satellite cell depletion	6
recombinant expression	6
bmp signaling	6
mptp treatment	6
muscular atrophy	6
muscle fiber type comparison	6
vaccination	6
snake venom injection	6
gne knockout	6
c. perfringens infection	6
mitochondrial disease	6
cardiotoxin treatment	6
mirna overexpression	6
neuromuscular blockade	6
hypoglycemia	6
muscle synergy	6
proteomic analysis	6
cortical stimulation	6
autophagy	6
crispr-cas9 gene editing	6
muscle degeneration	6
nutritional status	6
smoking	6
pka treatment	6
posture	6
systemic sclerosis	6
hypertrophic cardiomyopathy	6
diabetic neuropathy	6
dystrophin quantification	6
mavacamten treatment	6
gaa knockout	6
purification	6
genotype	6
controlled mechanical ventilation	6
myotonia	6
sciatic nerve stimulation	6
dynapenia	6
decompensated cirrhosis	6
myosin inhibition	6
maternal nutrition	6
acute respiratory distress syndrome	6
nusinersen treatment	6
ultrasound elastography	6
spasticity	6
genome sequencing	6
median nerve stimulation	6
carpal tunnel syndrome	6
microstimulation	6
length change	6
tendon repair	6
swallowing	6
spinal manipulation	6
living donor liver transplantation	6
aortic stenosis	5
landing	5
knee pain	5
mtm1 mutation	5
static handgrip	5
physical training	5
mechanical compression	5
antisense oligonucleotide treatment	5
pulmonary hypertension	5
whole body vibration exercise	5
rehabilitation training	5
muscle immobilization	5
carbohydrate loading	5
joint immobilization	5
sod1g93a transgenic model	5
total hip replacement	5
hydrogen peroxide exposure	5
swimming	5
overtraining	5
chronic fatigue syndrome	5
sleep restriction	5
tongue exercise	5
maximum voluntary contraction	5
high-intensity training	5
bed-rest	5
growth hormone administration	5
gait initiation	5
lipopolysaccharide injection	5
swimming exercise	5
adiporon treatment	5
isometric handgrip	5
plyometric exercise	5
fatiguing stimulation	5
calcium signaling	5
inorganic nitrate supplementation	5
cntf treatment	5
isometric fatigue	5
isometric muscle contraction	5
aquatic exercise	5
muscle sampling	5
hur knockout	5
lifestyle intervention	5
cortisol treatment	5
isometric dorsiflexion	5
action potential firing	5
power training	5
oxandrolone treatment	5
sirt1 overexpression	5
osteogenesis imperfecta	5
stimulation	5
stem cell therapy	5
interstitial lung disease	5
colorectal cancer surgery	5
ankle exoskeleton	5
computed tomography imaging	5
utrophin overexpression	5
detraining	5
postural threat	5
knee joint immobilization	5
hypobaric hypoxia	5
elamipretide treatment	5
hyperuricemia	5
active lengthening	5
lactate treatment	5
locomotive syndrome	5
hfpef	5
pedaling	5
follistatin overexpression	5
supplementation	5
nutrition intervention	5
obscurin knockout	5
5-fluorouracil treatment	5
locomotor training	5
fgf21 treatment	5
ankle exoskeleton assistance	5
membrane depolarization	5
sarcoglycanopathy	5
remote ischemic preconditioning	5
cognitive impairment	5
electrostimulation	5
laser injury	5
juvenile idiopathic arthritis	5
exoskeleton assistance	5
time-restricted eating	5
revascularization	5
reaching movements	5
sit-to-stand	5
treadmill locomotion	5
s1p treatment	5
acute intermittent hypoxia	5
energy deficit	5
dilated cardiomyopathy	5
notexin injection	5
external perturbation	5
mondoa knockout	5
active shortening	5
passive tension	5
sympathetic activation	5
muscle crush injury	5
muscle stretching	5
angii infusion	5
electromyography	5
akt1 transgene activation	5
pulmonary inflammation	5
high-fat/high-sucrose diet feeding	5
dietary patterns	5
electrical field stimulation	5
bladder cancer	5
hedgehog signaling	5
oral nutritional supplement	5
skeletal muscle mass	5
esophageal cancer	5
respiratory sarcopenia	5
pax3-foxo1 expression	5
circadian disruption	5
nicotinamide riboside treatment	5
wnt7a treatment	5
cox deficiency	5
vitamin e supplementation	5
aav-mediated gene therapy	5
nsaid treatment	5
mtor knockout	5
casq1 mutation	5
statin exposure	5
body mass index	5
mri analysis	5
pain	5
anthracycline treatment	5
dihydrotestosterone treatment	5
aortic banding	5
imatinib treatment	5
androgen receptor knockout	5
prolonged fasting	5
ethanol feeding	5
gene overexpression	5
six1 knockout	5
association study	5
gene expression comparison	5
low birth weight	5
collagen vi deficiency	5
magnetic stimulation	5
laminin α2 chain deficiency	5
bag3 mutation	5
cgrp treatment	5
high-fat feeding	5
exon skipping therapy	5
inflammatory myopathies	5
bile duct ligation	5
fibrosis	5
mechanical unloading	5
neural agrin injection	5
tropomyosin mutation	5
lidocaine block	5
spinal cord isolation	5
cardiotoxin-induced muscle injury	5
endotoxin	5
torpor	5
triadin knockout	5
hemiparetic stroke	5
il-10 knockout	5
chronic electrical stimulation	5
laparoscopic sleeve gastrectomy	5
mild cognitive impairment	5
euglycemic-hyperinsulinemic clamp	5
chemotherapy treatment	5
gating pore current	5
lithium treatment	5
wound healing	5
calcineurin activation	5
myosin extraction	5
ryanodine treatment	5
nivolumab treatment	5
bpa exposure	5
acidic saline injection	5
pax7 expression	5
idiopathic scoliosis	5
h2o2 exposure	5
glucose deprivation	5
20-hydroxyecdysone treatment	5
insulin deficiency	5
ionic strength	5
cafeteria diet	5
high altitude	5
glut4 overexpression	5
cholesterol depletion	5
cyclosporin a treatment	5
coexpression	5
substrate stiffness	5
tetracaine treatment	5
maternal undernutrition	5
ang ii treatment	5
tweak treatment	5
angiotensin ii	5
surgical approach	5
gentamicin treatment	5
microinjection	5
macrophage depletion	5
diet supplementation	5
ischaemia-reperfusion injury	5
smn depletion	5
glioblastoma	5
postmortem aging	5
immune checkpoint inhibitor treatment	5
carrageenan injection	5
leptin administration	5
muscle activity	5
ndufs4 knockout	5
maduramicin treatment	5
htlv-1 infection	5
sma mouse model	5
limb amputation	5
rna editing	5
tail amputation	5
heterotopic ossification	5
mdx	5
ctx-induced muscle injury	5
taurine treatment	5
ankylosing spondylitis	5
mafld	5
serum stimulation	5
plectin knockout	5
bortezomib treatment	5
actin interaction	5
antiretroviral therapy	5
heat treatment	5
18f-fdg pet/ct	5
mirna analysis	5
chronic constriction injury	5
dietary fat intake	5
ischemia reperfusion injury	5
taurine supplementation	5
nitric oxide treatment	5
obestatin treatment	5
mirna inhibition	5
il-1β treatment	5
cuff occlusion	5
urothelial carcinoma	5
cold adaptation	5
ezh2 inhibition	5
optical stimulation	5
sarcopenic visceral obesity	5
immortalization	5
c protein-induced myositis	5
chloroquine treatment	5
pancreatic cancer cachexia	5
actriib inhibition	5
myogenic induction	5
zoledronic acid treatment	5
calpainopathy	5
intrahepatic cholangiocarcinoma	5
ttn mutation	5
d-galactose injection	5
lineage tracing	5
facioscapulohumeral dystrophy	5
mstn inhibition	5
rituximab treatment	5
gamma irradiation	5
lafora disease	5
bacl2 injection	5
ouabain treatment	5
impaired glucose tolerance	5
freezing	5
sdf-1 treatment	5
antibody binding	5
heavy metal exposure	5
acetylcholine	5
nerve injury repair	5
wnt signaling	5
iron overload	5
hind limb ischaemia	5
influenza infection	5
alcoholic liver disease	5
postmortem interval estimation	5
camp treatment	5
fus mutation	5
chronic pancreatitis	5
immunosuppressive treatment	5
surgical trauma	5
diabetic hindlimb ischemia	5
machine learning classification	5
salbutamol treatment	5
glucose uptake	5
nephrectomy	5
lidocaine injection	5
drug screening	5
finger flexion	5
viral infection	5
isometric plantar flexion	5
steroid treatment	5
hydatid cyst	5
anatomical analysis	5
acute stroke	5
muscle loading	5
copy number variation	5
wrist movement	5
chronic neck pain	5
vaginal delivery	5
anesthesia	5
pelvic organ prolapse	5
sustained contraction	5
whiplash injury	5
muscle quality index	5
visual feedback	5
active stretch	5
botulinum toxin type a treatment	5
plantar fasciitis	5
rem sleep without atonia	5
muscle weakness	5
motor task	5
spasticity assessment	5
pkc activation	5
gesture recognition	5
pancreaticoduodenectomy	5
brachial plexus injury	5
biceps tenodesis	5
nutraceutical treatment	4
normal walking	4
coq10 deficiency	4
high-intensity cycling	4
knee extension exercise	4
prolonged exercise	4
whole-body vibration exercise	4
graded exercise test	4
load carriage	4
cyclosporine a treatment	4
postural sway	4
eaa supplementation	4
menopause	4
glycogen storage disease	4
gait training	4
grazing	4
fatigue protocol	4
adenosine	4
nhanes survey	4
swimming training	4
high-intensity functional training	4
intermittent claudication	4
mots-c treatment	4
chemical injury	4
exercise rehabilitation	4
whole body vibration training	4
nampt knockout	4
amino acid ingestion	4
next-generation sequencing	4
leg press exercise	4
muscle quality assessment	4
hypoperfusion	4
genistein treatment	4
myofascial trigger points	4
sprint training	4
lung transplant	4
incremental cycling	4
downhill walking	4
β2-adrenergic stimulation	4
marathon	4
carbohydrate supplementation	4
aerobic capacity	4
cbd treatment	4
pepck-c overexpression	4
hypoxia-ischemia	4
lung transplantation	4
aicar infusion	4
walking simulation	4
dynamic plantar flexion exercise	4
intravenous iron therapy	4
strength assessment	4
notch activation	4
cardiorespiratory fitness	4
weightlifting	4
progressive weighted wheel running	4
achilles tendon injury	4
bimagrumab treatment	4
lactate oxidation	4
moderate-intensity exercise	4
carbon monoxide exposure	4
collagen peptide supplementation	4
weight training	4
hirayama disease	4
warm-up	4
high protein diet	4
mtdna mutation analysis	4
push-up exercise	4
leg cycling	4
electric field stimulation	4
calcium treatment	4
seasonal variation	4
passive heating	4
treadmill stepping	4
alcohol treatment	4
level walking	4
hallux valgus	4
medial tibial stress syndrome	4
knee-extension exercise	4
incremental exercise test	4
exercise and nutrition intervention	4
cav1.1 mutation	4
leucine intake	4
nnos inhibition	4
fluvastatin treatment	4
lkb1 knockout	4
balance training	4
autophagy induction	4
pgc-1α knockout	4
fes cycling	4
sodium nitrate treatment	4
hamstring strain injury	4
nutritional therapy	4
intramuscular stimulation	4
sickle cell disease	4
gene manipulation	4
epicatechin treatment	4
pro-inflammatory cytokines	4
axotomy	4
botulinum neurotoxin a injection	4
step reduction	4
electromyostimulation	4
urolithin a supplementation	4
copd exacerbation	4
strength exercise	4
immunofluorescence staining	4
muscle wasting	4
phospholamban overexpression	4
lovastatin treatment	4
tibial nerve stimulation	4
acute heart failure	4
musculoskeletal injury	4
glycogen depletion	4
gene silencing	4
hypoxia acclimation	4
match-play tennis	4
high intensity training	4
bezafibrate treatment	4
as160 knockout	4
electrical vestibular stimulation	4
trimetazidine treatment	4
glucose load	4
nox2 knockout	4
golf swing	4
trpv1 activation	4
d2 knockout	4
high-carbohydrate diet	4
stim1 mutation	4
traumatic injury	4
urinary incontinence	4
compression garment	4
gpihbp1 knockout	4
rigor state	4
total parenteral nutrition	4
ranolazine treatment	4
hypoxia exposure	4
carnosine supplementation	4
sodium butyrate treatment	4
vitamin e deficiency	4
skin cooling	4
normobaric hypoxia	4
methionine restriction	4
yap overexpression	4
high-fat/high-sucrose diet	4
mdx mouse	4
triiodothyronine treatment	4
electroacupuncture	4
er stress induction	4
barth syndrome	4
anabolic steroid use	4
adenoviral transduction	4
acute decompensated heart failure	4
grafting	4
lifting tasks	4
drop landing	4
polyphenol supplementation	4
c26 cancer cachexia	4
tnnt1 mutation	4
malocclusion	4
platform translation	4
visual feedback manipulation	4
low-intensity vibration	4
long covid	4
hiv	4
hindlimb unloading and reloading	4
sulfur amino acid restriction	4
charcot-marie-tooth disease	4
stepping	4
atp stimulation	4
31p-mrs	4
milk supplementation	4
critical illness myopathy	4
betaine treatment	4
kinesio tape application	4
thyroidectomy	4
cancer-associated cachexia	4
mirna treatment	4
friedreich ataxia	4
metformin	4
roux-en-y gastric bypass surgery	4
pulmonary emphysema	4
myostatin knockdown	4
muscle strength assessment	4
muscle defect	4
vertebral compression fractures	4
biologic therapy	4
tyg index	4
glucose restriction	4
muscle dysmorphia	4
vibration training	4
bcaa treatment	4
negative pressure wound therapy	4
canagliflozin treatment	4
acipimox treatment	4
hind limb immobilization	4
suction feeding	4
abdominal obesity	4
age-related decline	4
t3 treatment	4
mediterranean diet	4
body composition measurement	4
binge drinking	4
calcium	4
wrist extension	4
gastrointestinal cancer	4
fkrp knockdown	4
neural stimulation	4
muscle segmentation	4
hydrogel implantation	4
quiescence	4
high-throughput sequencing	4
pge2 treatment	4
dynamic contractions	4
mstn gene editing	4
ace2 knockout	4
ipragliflozin treatment	4
cla supplementation	4
major abdominal surgery	4
venous distension	4
tetanic contraction	4
high-salt diet feeding	4
current injection	4
rearing system	4
covid-19 recovery	4
muscle ultrasound	4
muscle unloading	4
thyrotoxicosis	4
myosin mutation	4
hyperinsulinaemic clamp	4
heparin treatment	4
androgen receptor overexpression	4
cd36 knockout	4
prion infection	4
colchicine treatment	4
reprogramming	4
tmod1 knockout	4
wooden breast	4
sox6 knockout	4
myosin mutations	4
post-mortem storage	4
activation	4
intramuscular fat deposition	4
angiogenesis	4
atp release	4
ca2+-activation	4
myosin interaction	4
acute cold exposure	4
thermotherapy	4
cotransfection	4
dystrophic condition	4
subcellular fractionation	4
sodium channel expression	4
intralipid infusion	4
palliative chemotherapy	4
scrapie infection	4
rigor	4
body composition changes	4
fetal development	4
mutant expression	4
endothelin-1 treatment	4
rosiglitazone treatment	4
facial nerve transection	4
mtdna deletion mutations	4
dystroglycanopathy	4
tafazzin mutation	4
immune checkpoint inhibitors treatment	4
semistarvation-refeeding	4
agrin injection	4
titin mutation	4
dss-induced colitis	4
high-cholesterol diet feeding	4
excitation-contraction coupling	4
trypsin treatment	4
piperine treatment	4
synapse elimination	4
mtorc1 activation	4
tgfβ1 treatment	4
gys1 knockout	4
ionic strength variation	4
fk506 treatment	4
ethanol exposure	4
viral gene transfer	4
aav vector delivery	4
gsk-3 inhibition	4
ultrasound treatment	4
innervation	4
polymyositis and dermatomyositis	4
protein-protein interaction	4
myocarditis	4
chromatin immunoprecipitation	4
laminin-α2 deficiency	4
mechanical overloading	4
hedgehog signaling inhibition	4
calcium influx	4
cross-bridge cycle	4
mechanical injury	4
myogenic conversion	4
stem cell transplantation	4
β2-adrenoceptor stimulation	4
capn3 knockout	4
ethanol	4
lipopolysaccharide stimulation	4
peptide treatment	4
mtdna depletion syndrome	4
nucleotide exchange	4
sod1-g93a	4
achr clustering	4
α-syntrophin knockout	4
nebulin mutations	4
micropatterning	4
toxin injection	4
opa1 knockout	4
hind-limb unloading	4
rlc phosphorylation	4
dystrophin deletion	4
4-ap treatment	4
nmr spectroscopy	4
proteomics analysis	4
srf knockout	4
bag3 knockout	4
ryr1 knockout	4
smard1	4
atgl knockout	4
hdac6 inhibition	4
mtdna sequencing	4
co-reconstitution	4
pi3k inhibition	4
bdm treatment	4
pgc-1α expression	4
oxidant stress	4
tracer infusion	4
static stretch	4
caffeine stimulation	4
qtl analysis	4
pmi 5011 treatment	4
acupuncture	4
tbx1 knockout	4
stress relaxation	4
autoimmunity	4
parabiosis	4
clcn1 mutation	4
advanced pancreatic cancer	4
tafazzin knockout	4
fret measurement	4
adjuvant-induced arthritis	4
cam binding	4
r349p desmin knock-in	4
torpor-arousal cycle	4
free fatty acid treatment	4
scaffold culture	4
raav vector administration	4
electric stimulation	4
nebulin deficiency	4
dhea treatment	4
nucleotide turnover	4
mir-206 overexpression	4
cardiac injury	4
nutrient restriction	4
mir-155 overexpression	4
ghrelin treatment	4
aldosterone infusion	4
shortening	4
autopsy	4
immunostaining	4
mmp-9 knockout	4
metabolomic profiling	4
l-carnitine treatment	4
acetylcholine application	4
calcium depletion	4
dexamethasone injection	4
intramuscular fat content	4
gtp treatment	4
adiponectin overexpression	4
skeletal muscle development	4
autoantibody detection	4
aso treatment	4
oral squamous cell carcinoma	4
automated segmentation	4
implantation	4
grip strength	4
desmin mutation	4
tumor analysis	4
cryolesion	4
coq10 supplementation	4
oxygen tension	4
hip fracture surgery	4
genomic analysis	4
proteolysis	4
mtorc1 inhibition	4
cell differentiation	4
chemoradiation	4
tgf-β inhibition	4
liver disease	4
pseudomonas aeruginosa infection	4
whole-genome sequencing	4
myomixer knockout	4
aav vector injection	4
gaa deficiency	4
histological examination	4
sspn overexpression	4
aav transduction	4
botulinum neurotoxin injection	4
bont/a injection	4
somatic cell nuclear transfer	4
glycerol injury	4
letrozole treatment	4
antisynthetase syndrome	4
arid5b knockout	4
adiposity	4
fluoxetine treatment	4
ucp1 expression	4
opmd	4
t2dm	4
ck2 inhibition	4
living-donor liver transplantation	4
skeletal muscle contraction	4
autophagy modulation	4
il-4 treatment	4
chronic hindlimb ischemia	4
[truncated: 25,157 more rows]

## Sheet: target frequency
Target Text	Count
il6	3376
myogenin	3136
myod	2947
tnfα	2554
pgc1α	2449
creatine kinase	2385
insulin	2146
myosin heavy chain	2136
murf1	2098
atrogin1	2082
akt	2015
glut4	1946
glucose	1703
pax7	1624
ampk	1535
myostatin	1458
triglyceride	1221
atp	1203
lactate	1192
igf1	1154
citrate synthase	1067
il1β	1010
dystrophin	1001
ca2+	933
grip strength	927
muscle mass	887
body weight	867
p70s6k	867
glycogen	846
bmi	799
myf5	783
desmin	753
muscle strength	751
irs1	750
mtor	743
ros	734
sarcopenia	728
pakt	723
vegf	678
leptin	671
adiponectin	658
ryr1	654
heart rate	630
handgrip strength	612
p62	612
skeletal muscle mass	583
catalase	572
blood glucose	566
homair	550
fat mass	547
caspase3	547
sirt1	541
pparγ	540
smi	534
ucp1	533
il10	532
actin	515
vo2max	504
4ebp1	493
foxo1	487
myoglobin	479
collagen	478
sod	477
ldh	476
hba1c	464
mtdna	464
albumin	460
creatinine	446
mcp1	441
creactive protein	439
ki67	439
achr	431
pdk4	424
gait speed	417
ucp3	410
crp	403
alt	397
lc3	392
total cholesterol	389
cholesterol	386
mda	385
bcl2	383
overall survival	379
tfam	375
myh7	373
ast	368
sod2	368
collagen type i	368
myosin	364
acc	361
fgf21	358
tibialis anterior	352
titin	349
emg	346
no	344
mean arterial pressure	343
nfκb	342
central nuclei	342
rps6	341
bax	341
erk1/2	339
skeletal muscle index	339
p38 mapk	334
hemoglobin	334
mep	333
ffa	330
bdnf	330
mir206	326
sdh	326
pcr	324
tgfβ1	324
rectus femoris	324
p21	324
force	322
pampk	311
mmp9	309
h2o2	308
lean mass	307
cd68	306
irisin	303
lean body mass	301
tgfβ	298
lactate dehydrogenase	297
enos	296
ifnγ	293
nrf2	292
leucine	288
tg	286
gsk3β	282
complex i	280
cytochrome c	280
muscle thickness	279
cd31	276
mef2c	274
mir1	273
hif1α	272
fatfree mass	269
calcium	268
soleus	267
myh3	263
myh2	261
pcna	260
sod1	258
adp	257
testosterone	256
p53	256
cd36	255
biceps femoris	255
myh1	255
crosssectional area	255
gsh	255
vegfa	253
ph	252
col1a1	251
mfn2	251
systolic blood pressure	249
specific force	249
hsp70	247
foxo3a	246
capillary density	245
lc3ii	242
pax3	242
pparα	241
inos	241
as160	240
mmp2	240
il8	239
fibrosis	239
mhc	238
lc3b	234
nrf1	233
plasma glucose	233
vastus lateralis	231
glut1	231
myh4	230
bnip3	229
glucose uptake	228
ccl2	227
drp1	226
foxo3	226
ceramide	224
body mass index	222
plasma insulin	222
utrophin	222
myosin heavy chain i	220
brdu	220
norepinephrine	219
waist circumference	217
lpl	217
skeletal muscle mass index	216
muscle weight	215
complex iv	214
gfp	213
beclin1	212
gdf15	212
cortisol	211
insulin receptor	211
cytochrome c oxidase	209
hk2	209
nnos	208
blood lactate	208
protein carbonyl	208
age	208
phosphocreatine	207
map	206
gastrocnemius	205
gluteus maximus	204
body fat percentage	200
cmap	199
cpt1b	198
hr	196
perk1/2	196
glutamate	195
body mass	194
cyclin d1	194
nad+	192
diastolic blood pressure	192
igfi	191
hreflex	191
muscle protein synthesis	191
pyruvate	191
pennation angle	188
cpt1	187
myonuclei	187
cardiac output	186
jnk	186
serca1	186
appendicular skeletal muscle mass	185
malondialdehyde	184
αsma	184
blood flow	182
free fatty acids	182
alanine	182
pi3k	182
ucp2	181
βcatenin	181
mir133a	180
nadh	180
fvc	179
gluteus medius	179
il15	179
cox2	179
fabp4	179
fas	179
pmtor	178
asmi	178
myosin heavy chain iia	177
musk	177
ubiquitin	176
tnf	176
fibronectin	174
phenylalanine	174
oxygen consumption	173
pi	171
pepck	171
opa1	170
stat3	169
glutamine	168
muscle force	168
hand grip strength	167
fasn	167
hscrp	167
luciferase	167
vo2	166
mrf4	165
walking speed	164
insulin sensitivity	164
emyhc	164
fascicle length	160
f4/80	160
bone mineral density	159
bmd	159
troponin t	158
fndc5	157
hdlc	157
creatine	156
vastus medialis	156
sirt3	155
peak torque	155
mnsod	154
muscle volume	154
tropomyosin	153
4hne	152
hgf	152
mvc	152
quality of life	152
acta1	150
mcadherin	150
igf2	150
αactinin	150
satellite cells	149
dysferlin	149
gpx	149
vimentin	149
serum creatine kinase	149
cd34	148
myofiber crosssectional area	147
tbars	147
tetanic force	146
complex ii	146
il4	146
factin	146
aspartate aminotransferase	145
pink1	145
gh	144
igf1r	144
muscle glycogen	144
sarcomere length	144
alanine aminotransferase	144
gapdh	144
ejection fraction	143
emg activity	143
βdystroglycan	143
hdac4	142
cleaved caspase3	142
pdh	141
cox	141
weight	141
glycerol	140
nefa	140
fiber crosssectional area	140
glycogen synthase	140
caspase9	140
medial gastrocnemius	140
hgs	140
serum albumin	140
irs2	139
hsl	139
ldlc	139
biceps brachii	139
caveolin3	139
fatigue	138
isometric force	138
cox4	138
osteocalcin	138
cpeptide	138
nav1.4	137
laminin	137
mortality	137
troponin i	136
blood pressure	135
pain	135
dux4	134
protein synthesis	133
triacylglycerol	133
msna	132
collagen type iii	132
phase angle	132
ho1	131
fgf2	131
torque	131
parkin	131
βgalactosidase	130
alp	130
atgl	128
srebp1c	128
twitch force	128
tbc1d1	127
follistatin	127
neutrophils	127
chop	127
body fat	126
body fat mass	126
ckm	126
atf4	126
myosin heavy chain iib	125
superoxide	125
gfap	124
runx2	124
myh8	124
akt1	124
visceral adipose tissue	124
semitendinosus	123
glucagon	122
skeletal muscle	122
akt2	122
g6pase	121
total protein	120
col3a1	120
serca	120
stiffness	120
alkaline phosphatase	120
scd1	119
glutathione	119
gaa	119
ta	118
erector spinae	117
corticosterone	117
ctgf	116
valine	116
evans blue dye	116
vitamin d	115
bun	115
muscle soreness	114
isoleucine	114
pp70s6k	113
carnosine	112
muscle sympathetic nerve activity	112
fat fraction	112
pten	111
potassium	111
mfn1	111
αdystroglycan	111
iκbα	110
egfr	110
complex iii	110
clc1	110
fasting glucose	109
peak power	109
socs3	109
t2	109
adipoq	109
amp	108
ldl cholesterol	108
gpx1	108
myofiber size	108
visceral fat area	108
camp	108
ldl	108
mef2a	108
ache	108
stroke volume	107
cmyc	107
ulk1	107
contractile force	107
cd206	107
fev1	106
coxiv	106
hdl	105
timp1	105
bnp	105
atg7	105
mep amplitude	105
cd45	105
fatty acid oxidation	104
triceps brachii	104
myf6	104
mtorc1	104
mitochondria	104
mbnl1	104
palmitate	103
myosin heavy chain iix	103
acetylcholine	103
urea	103
tc	103
bmal1	103
hdl cholesterol	102
h3k27me3	102
epinephrine	101
vas	101
il1α	101
glycine	101
protein	101
serum creatinine	100
glutathione peroxidase	100
muscle crosssectional area	100
dag	100
serum insulin	100
hematocrit	100
cpt1a	100
tension	100
cav1.1	100
hsp72	99
grp78	99
pgc1β	99
appendicular lean mass	99
ferritin	99
fatigue index	98
sdha	98
eef2	98
βhydroxybutyrate	98
hydroxyproline	98
calf circumference	98
smad3	98
k+	98
cox1	98
ndufb8	97
cxcl1	97
nlr	97
ntprobnp	97
cdkn1a	97
tlr4	96
nqo1	96
quadriceps	96
vegfr2	96
mhci	96
dbp	96
gdnf	95
igfbp3	95
uric acid	95
mitochondrial respiration	95
pca50	95
mck	95
collagen i	94
muscle fiber crosssectional area	94
gssg	94
sma	94
camkii	93
ubiquitinated proteins	93
dmd	93
redd1	92
fis1	92
mitochondrial dna	92
emhc	92
pdgfrα	92
1rm	91
oleic acid	91
il18	91
intramuscular fat	91
chat	91
mct1	90
cd163	90
tdp43	90
sici	90
rac1	90
calsequestrin	90
myofiber diameter	90
ocr	90
mef2	89
troponin	89
glycogen phosphorylase	89
vat	89
progressionfree survival	89
ammonia	88
taurine	88
glp1	88
rectus abdominis	88
hb	88
clcn1	88
c/ebpα	88
vcam1	88
lateral gastrocnemius	88
icam1	88
edu	88
egfp	88
vmax	87
peak force	87
fiber diameter	87
diacylglycerol	87
pge2	87
nox4	87
per2	87
tbc1d4	87
tnnt3	87
mitochondrial membrane potential	86
fasting blood glucose	86
pfk	86
calpain	86
subcutaneous adipose tissue	86
smad2	86
skeletal muscle area	86
myosteatosis	85
pparδ	85
cfos	85
pp38 mapk	85
visceral fat	85
3methylhistidine	85
ccnd1	85
eif2α	84
igg	84
ncam	84
muscle fiber size	84
hamstrings	83
sppb	83
mir21	83
25(oh)d	83
ldha	83
bcaa	83
sox9	83
type i fibers	82
blood urea nitrogen	82
muscle quality	82
muscle stiffness	82
myotube diameter	82
fasting insulin	81
mir133b	81
energy expenditure	81
sdhb	81
pstat3	81
latissimus dorsi	81
pkb	81
ir	81
cathepsin l	81
tyrosine	81
tag	80
hsp27	80
macrophages	80
total body water	80
imat	79
angptl4	79
gastrocnemius medialis	79
tnnt1	79
imcl	79
serca2	79
s100	79
sol	78
embryonic myosin heavy chain	78
muscle activation	78
il2	78
cd11b	78
cdk2	78
fabp3	78
ctni	78
rer	77
fusion index	77
knee extensor strength	77
range of motion	77
eif4e	77
errα	77
nr4a3	77
muscle density	77
muscle fiber diameter	77
bip	77
anterior deltoid	76
sqstm1	76
hes1	76
atg5	76
citrate	75
stride length	75
peak vo2	75
nox2	75
hsp60	75
arginine	75
semg	75
puromycin	75
gs	75
nfatc1	75
p16	75
bmp2	75
knee extension strength	74
succinate	74
rpe	74
csa	74
fos	74
lc3bii	74
8ohdg	74
quadriceps strength	74
resistin	74
egr1	74
ryr2	74
vinculin	73
sparc	73
jump height	73
muscle activity	73
lvef	73
notch1	73
myomaker	73
stim1	73
muscle power	72
pectoralis major	72
myofibrillar protein	72
rankl	72
hsp90	72
nlrp3	72
srebp1	72
hmgb1	72
smn	72
mps	71
nitrotyrosine	71
ckmb	71
myhc i	71
p16ink4a	71
power output	70
mct4	70
myofibrillar protein synthesis	70
fak	70
actn3	70
myhc iia	70
6mwd	70
acetylcarnitine	70
na+	70
aldolase	70
fractional shortening	70
inorganic phosphate	70
lamp1	70
h3k4me3	70
ach	69
infraspinatus	69
muscle synergy	69
lamp2	69
dna	69
αsarcoglycan	69
muscle fibers	69
cxcl10	69
klf15	68
leg blood flow	68
rms	68
nampt	68
tunel	68
wbc	68
vm	68
ptp1b	68
pck1	68
tnni1	68
intramyocellular lipid	67
o2	67
myl2	67
emg amplitude	67
muscle fiber area	67
tug	67
acylcarnitines	67
fatigue resistance	67
yap	67
sln	67
serca2a	67
erythrocyte sedimentation rate	67
hhb	66
power	66
complex v	66
sodium	66
asm	66
cd8	66
tnni2	66
cd56	66
force production	66
gdf11	65
uqcrc2	65
fat/cd36	65
myhc iib	65
sarcopenic obesity	65
voluntary activation	65
vdac	65
strength	65
smm	65
hexokinase	65
creb	65
nebulin	65
mg	64
6mwt	64
rf	64
serine	64
fatty acid	64
orai1	64
cd3	64
cxcr4	64
motor neurons	64
γh2ax	64
neurofilament	64
atpase	64
ca2+ release	63
pjnk	63
external oblique	63
hmox1	63
igfbp5	63
fbf	63
mtco1	63
myc	63
il1	63
lipid droplets	63
mef2d	63
bone mineral content	63
sbp	63
srf	63
mpo	63
atp synthase	63
ar	63
parvalbumin	63
cell viability	63
bcaas	63
atf3	63
cdk4	63
ps6	63
skeletal muscle density	63
lncrna	63
c3	62
physical performance	62
25hydroxyvitamin d	62
gpx4	62
mb	62
lif	62
mmp13	62
slc2a4	62
activin a	62
vdr	62
muscle function	62
2deoxyglucose	62
young's modulus	62
peroneus longus	62
fasting plasma glucose	62
rhoa	62
ca2+ transient	62
atpase activity	62
lymphocytes	61
vﾌ㎜2	61
ngf	61
synaptophysin	61
tgfb1	61
survival	61
capn3	61
arg1	61
cmap amplitude	61
troponin c	61
txnip	61
sca1	61
reactance	61
ccl5	61
oxygen consumption rate	60
vascular conductance	60
cmet	60
gastrocnemius lateralis	60
methionine	60
col1a2	60
gadd45a	60
estradiol	60
pai1	60
t3	60
tsh	60
echo intensity	60
ca2+ sensitivity	60
gshpx	60
myhci	60
glut2	60
maximum isometric force	59
cmep	59
myh6	59
sto2	59
ghrelin	59
caveolin1	59
alb	59
diseasefree survival	59
shear force	59
forearm vascular conductance	58
sterified fatty acids	58
atp5a	58
white blood cell count	58
collagen iii	58
collagen vi	58
fn1	58
smo2	58
ca2+ sparks	58
intermuscular adipose tissue	58
shear modulus	58
cd4	58
spp1	58
c/ebpβ	58
gata4	58
left ventricular ejection fraction	57
adenosine	57
fat oxidation	57
lipid peroxidation	57
oxphos	57
glucose tolerance	57
pyruvate kinase	57
cidea	57
cgrp	57
il1ra	57
p70s6k1	57
fat	57
tfeb	57
telomere length	57
os	57
ldhb	56
maximal voluntary contraction	56
nitrite	56
decorin	56
protein intake	56
ffm	56
brachioradialis	56
vfa	56
atp2a1	56
casq1	56
fractional anisotropy	56
mrna	56
knee flexion	55
mmp3	55
ground reaction force	55
ca2+ transients	55
h19	55
pain intensity	55
apoptosis	55
3nitrotyrosine	55
fbg	55
survival rate	55
t1	55
myofibers	55
total fat mass	54
forearm blood flow	54
mvc torque	54
glucose oxidation	54
gr	54
serum glucose	54
gsk3	54
xbp1	54
proline	54
des	54
αbcrystallin	54
saβgal	54
resistance	54
sat	54
membrane potential	53
scd	53
physiological crosssectional area	53
myotilin	53
velocity	53
bag3	53
fatp1	53
aqp4	53
tryptophan	53
postoperative complications	53
quantal content	53
myhc1	53
cx43	53
lacz	53
fibrinogen	53
dhpr	52
exercise capacity	52
muscle area	52
lipid	52
tsc2	52
muscle atrophy	52
mwave	52
lysine	52
lc3i	52
βhad	52
serratus anterior	52
mhciia	52
h3k27ac	52
tnnt2	52
po2	51
runx1	51
iba1	51
myl1	51
plin2	51
fst	51
βsarcoglycan	51
cjun	51
multifidus	51
physical activity	51
caspase8	51
bilirubin	51
ankrd1	51
upper trapezius	51
cacna1s	51
myhciia	51
ca2+ current	51
myhciib	51
mir499	51
zscan4	51
osteopontin	51
axin2	51
smooth muscle actin	51
scn4a	50
mcu	50
semimembranosus	50
p27	50
mir29a	50
il13	50
acetylcholine receptor	50
serotonin	50
irβ	50
αdg	50
percent body fat	50
neuromuscular junctions	50
mmax	50
fmi	50
rapsyn	50
twitch tension	50
mtdna copy number	50
g6pc	50
six1	50
myotubes	50
cpt2	50
smd	50
dgat2	50
agrin	50
pkcθ	50
tdtomato	50
calpain1	49
cgmp	49
coq10	49
pygm	49
id1	49
nav1.5	49
mir133	49
iron	49
nfkb	49
dlk1	49
nestin	49
fhl1	49
mymk	49
lamin a/c	49
actc1	49
ktr	49
oxygen uptake	48
ampkα2	48
carbonylated proteins	48
mgf	48
bf	48
cathepsin b	48
hypoxanthine	48
step length	48
total antioxidant capacity	48
g6p	48
tnc	48
total work	48
cardiolipin	48
liver glycogen	48
mhc1	48
pacc	48
fmd	48
adipor1	48
strain	48
sdf1	48
mepp	48
actn2	48
stat1	48
ltype ca2+ current	48
cxcl12	48
cd44	48
pmi	48
coherence	47
rate of torque development	47
apelin	47
plasma lactate	47
acetylcoa	47
reaction time	47
joint angles	47
food intake	47
total rna	47
rbp4	47
pgsk3β	47
necrosis	47
sarcolipin	47
dio2	47
elastic modulus	47
ctnt	47
nachr	47
plin5	46
psmad3	46
mir486	46
mmp14	46
collagen iv	46
asic3	46
subcutaneous fat	46
differentially expressed genes	46
gys1	46
mir155	46
eosinophils	46
h reflex	46
esr	46
2dg	46
triceps	46
histidine	46
myosin light chain	46
dmpk	46
hey1	46
hnav1.4	46
isometric torque	45
capillarytofiber ratio	45
glucose6phosphate	45
gm	45
mir146a	45
action potential	45
p65	45
sensitivity	45
perilipin	45
aif	45
tnnc1	45
mir23a	45
pth	45
zinc	45
timp2	45
vwf	45
fatty infiltration	45
myosin heads	45
hdlcholesterol	44
isometric strength	44
ppara	44
fmax	44
mean arterial blood pressure	44
pmax	44
total lean mass	44
intramyocellular lipids	44
trpv1	44
leg lean mass	44
mitochondrial content	44
serca1a	44
median frequency	44
pfkm	44
proteasome activity	44
lep	44
gaba	44
l3smi	44
mmp1	44
force generation	44
appendicular skeletal muscle mass index	44
pirs1	44
cd8+ t cells	44
ezh2	44
biceps	44
bmp4	44
cystatin c	44
carnitine	43
imp	43
mvic	43
dgat1	43
glucose infusion rate	43
imtg	43
total body fat	43
hif1a	43
myl3	43
ggt	43
rate of force development	43
androgen receptor	43
resting energy expenditure	43
skin temperature	43
posterior deltoid	43
hdac5	43
pc	43
platelet count	43
mean diffusivity	43
bin1	43
srebf1	43
ace2	43
flnc	43
p4ebp1	43
height	42
creatinine kinase	42
epa	42
erk2	42
phosphatidylcholine	42
junb	42
vﾌ㎜2peak	42
bfgf	42
msna burst frequency	42
resting membrane potential	42
4hydroxynal	42
hmgcr	42
mg53	42
c reactive protein	42
ffmi	42
ankle dorsiflexion	42
myhc2a	42
chrna1	42
active force	42
caspase1	42
corticomuscular coherence	42
ryr3	41
tom20	41
glucose transport	41
igfii	41
dha	41
cd11c	41
hydrogen peroxide	41
anp	41
myosin heavy chain ii	41
sclerostin	41
t4	41
mir29b	41
muscle endurance	41
dopamine	41
thb	41
myeloperoxidase	41
time to exhaustion	41
mir31	41
per1	41
transferrin	41
nos2	41
aβ	41
allcause mortality	41
phosphorus	41
calmodulin	41
prdm16	41
prealbumin	41
pdk1	41
sox2	41
nkx2.5	41
ryanodine	41
αactin	41
drip loss	41
total peripheral resistance	40
sox6	40
co	40
running distance	40
malate	40
gsk3α	40
ldlcholesterol	40
foxo	40
fdg	40
acetylcholine receptors	40
mip	40
nitrate	40
alanine transaminase	40
specificity	40
fstl1	40
αsmooth muscle actin	40
grip force	40
inflammation	40
ampkα	40
psmad2/3	40
fiber size	40
mitochondrial proteins	40
fto	40
calcineurin	40
vdac1	40
phase	40
clock	40
achrα	40
mune	40
flexor carpi radialis	40
γsarcoglycan	40
2025-10-04	40
cxcl2	40
sodium current	40
igfbp2	40
cr	39
slow myosin heavy chain	39
fumarate	39
mitochondrial function	39
tsp1	39
protein degradation	39
citrulline	39
cuznsod	39
pressure pain threshold	39
heart weight	39
mir378	39
fatty acid synthase	39
muscle length	39
threonine	39
anf	39
deltoid	39
sarcopenia prevalence	39
muscle hypertrophy	39
muscle wet weight	39
et1	39
substance p	39
npy	39
fpg	39
type ii fibers	39
pecam1	39
coxi	39
spasticity	39
calpain3	39
plin1	39
cleaved caspase 3	39
vastus intermedius	39
microvascular blood flow	39
supraspinatus	39
energy intake	39
gcsf	39
tau	39
adipose tissue	39
acaca	39
myelinated axons	39
diabetes	39
ppi3k	39
vglut1	39
cd86	39
recurrencefree survival	39
shear wave velocity	39
gli1	39
v0	38
gdf8	38
temperature	38
vl	38
aconitase	38
ornithine	38
basal metabolic rate	38
knee extension	38
hsp25	38
rcr	38
nox	38
6minute walk distance	38
collagen type iv	38
mir34a	38
apoptotic cells	38
ace	38
aspartate	38
barthel index	38
acc1	38
hypertension	38
myh	38
gap43	38
taz	38
p300	38
meld score	38
isl1	38
motor function	38
dnm2	38
pdgfra	38
h3k9me3	38
total testosterone	37
timed up and go test	37
depression	37
vertical ground reaction force	37
type iia fibers	37
malonylcoa	37
h+	37
low muscle mass	37
amino acids	37
hbo2	37
contraction time	37
erk1	37
sppb score	37
calcium sensitivity	37
βhydroxyacylcoa dehydrogenase	37
isometric tension	37
phosphate	37
cognitive function	37
gabarapl1	37
il17	37
opg	37
lipoprotein lipase	37
neb	37
nanog	37
cyclind1	37
shear wave speed	37
csrp3	37
minute ventilation	36
balance	36
carbohydrate oxidation	36
obesity	36
lower trapezius	36
fcr	36
sartorius	36
palmitic acid	36
3hydroxybutyrate	36
flexor digitorum superficialis	36
fsh	36
halfrelaxation time	36
branchedchain amino acids	36
vﾌ㎜2max	36
va	36
arachidonic acid	36
mg2+	36
maximal force	36
fa	36
anserine	36
muscle temperature	36
renal sympathetic nerve activity	36
sfa	36
icf	36
muscle creatine kinase	36
atpmax	36
rantes	36
ddimer	36
recruitment threshold	36
lkb1	36
malnutrition	36
pni	36
il12	36
latency	36
cocontraction index	36
open probability	36
length of stay	36
sfi	36
passive tension	35
myonectin	35
trkb	35
iemg	35
respiratory exchange ratio	35
muscle	35
psmad2	35
becn1	35
short physical performance battery	35
mean power	35
maximum force	35
trapezius	35
pka	35
progesterone	35
lh	35
internal oblique	35
pkcε	35
gir	35
igm	35
raptor	35
oxidative stress	35
nadph	35
muscle fatigue	35
mbp	35
plasma leucine	35
fds	35
myhc2b	35
trabecular number	35
sarcf	35
apoptotic nuclei	35
fiber length	35
atf6	35
tpm2	35
apoa1	35
pfs	35
il33	35
rb	35
pitx2	35
ncadherin	35
[3h]ryanodine	35
thin filament length	35
ckit	35
ca(2+)	35
oxygen	34
mdm2	34
cmj	34
hip flexion	34
met	34
serum triglycerides	34
yy1	34
ccl4	34
lat1	34
o2hb	34
periostin	34
doms	34
frailty	34
peif2α	34
na+ current	34
cd20	34
iliopsoas	34
nr4a1	34
gastrocnemius muscle weight	34
thigh muscle volume	34
adductor magnus	34
total bilirubin	34
subscapularis	34
gluteus minimus	34
muscle tone	34
epp	34
lrp4	34
thbs1	34
vacht	34
acadm	34
achr clusters	34
plr	34
choline	34
ghr	34
cdkn2a	34
cugbp1	34
rating of perceived exertion	33
free testosterone	33
leukocytes	33
ventilation	33
lowdensity lipoprotein cholesterol	33
bclxl	33
bmc	33
rotarod performance	33
peak power output	33
pras40	33
snat2	33
nfκb p65	33
mhciix	33
cpt1α	33
adverse events	33
cdc42	33
cry1	33
p21cip1	33
lifespan	33
18ffdg	33
[ca2+]i	33
smad7	33
αketoglutarate	33
ant1	33
osteoporosis	33
g6pd	33
conduction velocity	33
cam	33
mtdna deletions	33
type i collagen	33
cav1.2	33
cd4+ t cells	33
dystroglycan	33
active tension	32
metabolic syndrome	32
insulin resistance	32
klotho	32
keap1	32
inosine	32
cadence	32
palmitate oxidation	32
δsarcoglycan	32
spo2	32
body composition	32
ppt	32
matsuda index	32
contractility	32
nt3	32
fkbp12	32
cycs	32
muscle attenuation	32
cyr61	32
snap25	32
asparagine	32
calpastatin	32
igfbp1	32
hspb1	32
cea	32
myosin regulatory light chain	32
gclc	32
pkm	32
βmhc	32
magnesium	32
motor units	32
myofibrils	32
aldoa	32
passive force	32
inflammatory cells	32
pabpn1	32
mhc class i	32
fgfr1	32
intracellular ph	31
atp5a1	31
maximum voluntary contraction	31
rheb	31
gastrocnemius weight	31
tunelpositive nuclei	31
tgfβ2	31
k	31
reverbα	31
rom	31
paktser473	31
monocytes	31
knee flexion angle	31
p1np	31
inflammatory cytokines	31
qmax	31
compound muscle action potential	31
myhc iix	31
cleaved parp	31
knee extensors	31
adductor longus	31
neun	31
ampkα1	31
nppa	31
average power	31
lcad	31
lipofuscin	31
atp2a2	31
ve	31
auc	31
tibialis posterior	31
mapk	31
classification accuracy	31
cryab	31
il5	31
tbx1	31
fn14	31
smad4	31
rna	31
tumor size	31
alphaactinin	31
caspase7	31
ccl3	31
cyclin e	31
gactin	31
col6a1	31
cdk1	31
myoblasts	31
ca199	31
igf1ea	30
hmax	30
deoxyhemoglobin	30
homocysteine	30
calpain 3	30
nr1d1	30
opn	30
id3	30
1rm bench press	30
sod3	30
mir221	30
tlr2	30
nh	30
cyt c	30
mhc2a	30
pcreb	30
middle deltoid	30
white blood cells	30
cortical thickness	30
malate dehydrogenase	30
eno3	30
infarct size	30
extensor digitorum longus	30
motor unit firing rate	30
aspartate transaminase	30
ca2+atpase	30
dyspnea	30
nuclei	30
epo	30
coefficient of variation	30
myhc2x	30
bmr	30
epsp	30
birefringence	30
selenium	30
myh7b	30
joint torque	30
talin	30
traf6	30
bcat2	30
trim43	30
d2	30
gpx3	30
yap1	30
gastrocnemius mass	30
isg15	30
trap	30
tpm3	30
αtubulin	30
lox	30
caffeine	30
pdl1	30
glycogen synthesis	30
notch3	30
tp53	30
adipocyte size	30
echogenicity	30
median nerve	30
achrγ	30
wnt3a	30
ica	30
staphylococcus aureus	30
leg vascular conductance	29
ankrd2	29
intermuscular fat	29
endurance	29
musclin	29
id2	29
muscle size	29
maximal strength	29
physical function	29
liver weight	29
leg strength	29
parp1	29
nadh dehydrogenase	29
type i fibres	29
capillarytofibre ratio	29
ua	29
kdr	29
citrate synthase activity	29
lmna	29
ang ii	29
anxiety	29
gp91phox	29
perfusion	29
mip1α	29
pak1	29
tac	29
ndufa9	29
cd9	29
sv2	29
6minute walk test	29
m2 macrophages	29
pkc	29
adipor2	29
locomotor activity	29
alm	29
erbb2	29
rage	29
mmse	29
pkm2	29
col2a1	29
aggrecan	29
trpc1	29
heart rate variability	29
flexor carpi ulnaris	29
erα	29
wnt5a	29
sodium channel	29
gck	29
alphafetoprotein	29
prpsc	29
adc	29
charge movement	29
e2	28
vco2	28
gmed	28
acc2	28
healthrelated quality of life	28
rmt	28
accuracy	28
fatfree mass index	28
mir222	28
motor evoked potential	28
tni	28
triadin	28
half relaxation time	28
fiber area	28
mir29	28
leg press strength	28
flexibility	28
ci	28
aldosterone	28
cardiac troponin i	28
intracellular water	28
extracellular water	28
pcsa	28
silent period	28
maximal isometric force	28
necrotic fibers	28
homaβ	28
fgf23	28
nfe2l2	28
total glutathione	28
fins	28
phospholamban	28
cpt1β	28
nad	28
kc	28
phosphatidylethanolamine	28
highdensity lipoprotein	28
3hydroxyacylcoa dehydrogenase	28
pln	28
pdgfbb	28
λ1	28
gmcsf	28
gst	28
trabecular thickness	28
myhciix	28
acox1	28
mitochondrial ros	28
myomixer	28
mylpf	28
carcass weight	28
vati	28
prb	28
sarcomeric αactinin	28
na+ channel	28
mitochondrial volume density	27
maximal tetanic force	27
porin	27
ankle torque	27
paco2	27
cysteine	27
ctsb	27
free carnitine	27
appendicular muscle mass	27
mir223	27
platelets	27
state 3 respiration	27
subcutaneous fat area	27
ft4	27
peak velocity	27
th	27
vascular endothelial growth factor	27
vertical jump height	27
essential amino acids	27
snr	27
lbm	27
gclm	27
peak tetanic force	27
nafld	27
glycemia	27
cytochrome oxidase	27
mif	27
cathepsin d	27
maximal isometric torque	27
hadha	27
fdi	27
filamin c	27
tweak	27
fm	27
mir208b	27
vcp	27
acetate	27
mybph	27
sphingomyelin	27
glyceraldehyde3phosphate dehydrogenase	27
microvascular blood volume	27
pomc	27
ndufs3	27
pthrp	27
ppard	27
dok7	27
mbd3l2	27
λ3	27
sm	27
gsr	27
highdensity lipoprotein cholesterol	27
proinflammatory cytokines	27
gip	27
bone mass	27
h3k4me1	27
rlc	27
degs	27
δﾏ・	27
cry2	27
mbnl2	27
hdac1	27
ocn	27
app	27
fgfr4	27
axon diameter	27
ina	27
prv	27
nfatc3	27
rimmed vacuoles	27
quicki	26
cytc	26
systolic bp	26
endothelin1	26
sv	26
atg12	26
ddit4	26
tgfβ3	26
peak oxygen uptake	26
foxp3	26
phenylephrine	26
cerebral blood flow	26
mir181a	26
myd88	26
bmp7	26
corticospinal excitability	26
butyrate	26
mitochondrial protein	26
vegfr1	26
ckmt2	26
jak2	26
cox4i1	26
linoleic acid	26
mhciib	26
appendicular skeletal muscle index	26
mobility	26
α7 integrin	26
aspartic acid	26
pt	26
parathyroid hormone	26
pfkfb3	26
col4a1	26
lowdensity lipoprotein	26
igfbp4	26
edc	26
s1p	26
laminin α2	26
length of hospital stay	26
s100a8	26
s100a9	26
total adipose tissue	26
ree	26
microdystrophin	26
ncam1	26
fat mass index	26
grp94	26
cox5a	26
tnnc2	26
λ2	26
pha	26
intracellular calcium	26
pdha1	26
glucokinase	26
rbc	26
hspa5	26
taoc	26
nfat	26
myofiber area	26
mybpc1	26
liver	26
cd90	26
skeletal muscle radiodensity	26
cyclin b1	26
cxcl9	26
firing rate	26
ccnd2	26
motoneurons	26
ampd1	25
lg	25
deptor	25
αtocopherol	25
acsl1	25
lipid oxidation	25
plasma triglycerides	25
force output	25
ca2+ release flux	25
rmr	25
maximal oxygen uptake	25
oxidative stress markers	25
visfatin	25
dnmt1	25
dnmt3a	25
forelimb grip strength	25
gsh/gssg	25
knee flexors	25
waisttohip ratio	25
cox activity	25
oxidative phosphorylation	25
apoe	25
left ventricular mass	25
metabolic rate	25
il6r	25
metrnl	25
tetanic tension	25
tensor fasciae latae	25
p27kip1	25
m1 macrophages	25
rectus femoris crosssectional area	25
peak isometric torque	25
cxcl5	25
intramuscular adipose tissue	25
mir27a	25
trib3	25
ca	25
casq2	25
protein content	25
docosahexaenoic acid	25
myonuclear number	25
eif4ebp1	25
motor unit discharge rate	25
actb	25
extensor carpi radialis	25
body temperature	25
sp1	25
pik3r1	25
myl4	25
mir122	25
sqstm1/p62	25
s100b	25
acta2	25
ctnnb1	25
emerin	25
action potentials	25
glucose6phosphatase	25
l*	25
adam12	25
myofibre crosssectional area	24
specific tetanic force	24
cox5b	24
snp	24
pao2	24
twitch torque	24
mean blood pressure	24
ages	24
tsi	24
glut 4	24
medial hamstrings	24
vertical jump	24
mir126	24
pgc1α4	24
ctx	24
timp3	24
kynurenine	24
eif4g	24
muscs	24
myotonic discharges	24
oglcnac	24
emcl	24
pdk2	24
peak twitch force	24
shortening velocity	24
pgc1	24
pfoxo3a	24
fast myosin heavy chain	24
stress	24
tgfb2	24
bad	24
abductor hallucis	24
type iib fibers	24
bone density	24
pbf	24
ccr2	24
chair stand test	24
nr4a2	24
soce	24
myofiber	24
mff	24
c5b9	24
wc	24
elbow flexion	24
achilles tendon	24
muscle protein breakdown	24
myh11	24
mdf	24
pgam2	24
blood perfusion	24
ap2	24
ecar	24
angiotensin ii	24
ddit3	24
suvmax	24
collagen content	24
myoinositol	24
mybpc2	24
gracilis	24
cell proliferation	24
parp	24
postn	24
precision	24
trpc3	24
cyclin d3	24
sarcomeric myosin	24
mxa	24
cooking loss	24
pdi	24
sati	24
ndufs1	23
gait velocity	23
vlcad	23
st	23
cardiorespiratory fitness	23
f2isoprostanes	23
xbp1s	23
mitochondrial density	23
acylcarnitine	23
ckmm	23
hmb	23
dnmt3b	23
vitamin c	23
t2 relaxation time	23
oxygen saturation	23
acadl	23
gastrocnemius muscle mass	23
knee extensor torque	23
femoral blood flow	23
sf36	23
mhc2b	23
[truncated: 82,681 more rows]

## Sheet: common&unique paths
Common path			Unique path in Exer #1			Unique path in Exer #2			Unique path in Exer #3
Edge	Distance		Edge	Distance		Edge	Distance		Edge	Distance
nrf2 => myf5	0.115952		sod1 => lc3bii	0.106556		reverbα => runx1	0.125353		sod1 => lc3bii	0.109294
mitochondrial morphology => ucp1	0.139922		complex iv => myostatin	0.106556		psmb5 => myosin heavy chain	0.125353		complex iv => myostatin	0.109294
nrf2 => myod	0.153357		mfn2 => ace2	0.106556		opa1 => muscle mass	0.125353		tlr4 => myostatin	0.109294
pparγ => runx1	1.53378		malondialdehyde => myostatin	0.106556		muscle mass => runx1	0.125353		mfn2 => ace2	0.109294
opa1 => tnf	1.55005		ace2 => myostatin	0.106556		yme1l1 => psmb5	0.125353		malondialdehyde => myostatin	0.109294
mitochondrial morphology => bax	1.56801		pampk => myostatin	0.106556		myosin heavy chain => runx1	0.125353		sod1 => mmp12	0.109294
bax => met	1.56801		pparγ => dbp	0.106556		mfn2 => reverbα	0.125353		complex i => myostatin	0.109294
il1β => junb	1.92481		uqcrc2 => myhc2a	0.106556		ldh => cyclin d1	0.133783		ace2 => myostatin	0.109294
akt => pappa	2.10695		mfn2 => pampk	0.106556		cyclin d1 => met	0.133783		opa1 => complex i	0.109294
mir1 => myostatin	2.16728		lc3bii => myostatin	0.106556		nrf2 => pax3	0.133783		pampk => myostatin	0.109294
uqcrc2 => il1β	2.2427		myf5 => myostatin	0.106556		nrf2 => creatine	0.133783		pparγ => dbp	0.109294
myod => runx1	2.24755		runx1 => myostatin	0.106556		creatine => met	0.133783		mfn2 => pampk	0.109294
myf5 => runx1	2.24755		sod1 => mir1	0.106556		insulin => junb	0.140908		lc3bii => myostatin	0.109294
pax3 => met	2.28419		opa1 => tlr4	0.106556		murf1 => junb	0.140908		myf5 => myostatin	0.109294
mitochondrial morphology => atrogin1	2.28727		myeloperoxidase => malondialdehyde	0.106556		uqcrc2 => pgc1α	0.140908		runx1 => myostatin	0.109294
uqcrc2 => akt	2.3031		tnf => myostatin	0.106556		uqcrc2 => hk2	0.140908		sod1 => mir1	0.109294
opa1 => pparγ	2.46763		4hydroxynal => myostatin	0.106556		pgc1α => junb	0.140908		opa1 => complex iii	0.109294
cinc1 => myeloperoxidase	2.51027		mitochondrial morphology => mitochondrial biogenesis	0.106556		crtc2 => junb	0.140908		opa1 => tlr4	0.109294
mfn2 => opa1	3.11803		myhc2a => myostatin	0.106556		atrogin1 => junb	0.140908		myeloperoxidase => malondialdehyde	0.109294
uqcrc2 => myl3	3.30107		catalase => myostatin	0.106556		nr4a3 => junb	0.140908		tnf => myostatin	0.109294
myl3 => glul	3.30107		mitochondrial biogenesis => myostatin	0.106556		hk2 => junb	0.140908		4hydroxynal => myostatin	0.109294
glutamate => glul	3.33057		yme1l1 => sod1	0.106556		coxiv => murf1	0.140908		mfn2 => tlr4	0.109294
electrondense contact sites => opa1	3.43359		mitochondrial morphology => 4hydroxynal	0.106556		uqcrc2 => nr4a3	0.140908		mitochondrial morphology => mitochondrial biogenesis	0.109294
pgc1β => myostatin	3.52767		ucp1 => myostatin	0.106556		ncor1 => junb	0.140908		mmp12 => myostatin	0.109294
opa1 => pgc1β	3.52767		mfn2 => catalase	0.106556		mitochondrial morphology => insulin	0.140908		catalase => myostatin	0.109294
capillary density => myostatin	3.52884		dbp => myostatin	0.106556		ucp1 => musk	0.171059		mitochondrial biogenesis => myostatin	0.109294
opa1 => foxo3α	3.53463		mfn2 => complex iv	0.106556		neb => musk	0.171059		complex iii => myostatin	0.109294
foxo3α => myostatin	3.53463		tlr4 => myostatin	0.106644		uqcrc2 => p62	0.171059		yme1l1 => sod1	0.109294
cinc1 => cd68	3.53463		complex i => myostatin	0.106687		p62 => musk	0.171059		mitochondrial morphology => 4hydroxynal	0.109294
eef1a2 => myostatin	3.53604		opa1 => complex i	0.106687		myh4 => musk	0.171059		ucp1 => myostatin	0.109294
opa1 => eef1a2	3.53604		opa1 => complex iii	0.106687		ulk1 => musk	0.171059		mfn2 => catalase	0.109294
opa1 => creatine kinase	3.53604		complex iii => myostatin	0.106687		akt => musk	0.171059		dbp => myostatin	0.109294
creatine kinase => myostatin	3.53781		pparγ => myostatin	0.106818		il1β => musk	0.171059		mfn2 => complex iv	0.109294
mitochondrial morphology => fatigue resistance	3.54018		mfn2 => pparγ	0.106818		acta1 => musk	0.171059		reverbα => runx1	0.122602
c reactive protein => myostatin	3.54018		mfn2 => tlr4	0.106818		uqcrc2 => neb	0.171059		mfn2 => reverbα	0.122602
opa1 => cleaved parp	3.54018		uqcrc2 => myod	0.181799		ryr1 => musk	0.171059		psmb5 => myosin heavy chain	0.122602
cleaved parp => myostatin	3.54018		mfn2 => caveolin3	0.181799		uqcrc2 => myh4	0.171059		opa1 => muscle mass	0.122602
cytochrome c oxidase => myostatin	3.54018		electrondense contact sites => mfn2	0.181799		uqcrc2 => acta1	0.171059		muscle mass => runx1	0.122602
uqcrc2 => cytochrome c oxidase	3.54018		caveolin3 => adamts8	0.181799		uqcrc2 => crtc2	0.172351		yme1l1 => psmb5	0.122602
mmp9 => mhc	3.54018		uqcrc2 => cytochrome c	3.60271		uqcrc2 => myod	0.183674		myosin heavy chain => runx1	0.122602
runx1 => mir1	3.54018		cytochrome c => myostatin	3.60271		mfn2 => caveolin3	0.183674		nrf2 => pax3	0.134407
actn2 => myostatin	3.54018		uqcrc2 => myh7	4.37111		electrondense contact sites => mfn2	0.183674		nrf2 => creatine	0.134407
cd68 => c reactive protein	3.54018		anxa2 => runx1	4.37111		caveolin3 => adamts8	0.183674		creatine => met	0.134407
nadh => myostatin	3.54018		uqcrc2 => uqcrc1	4.37111		crtc2 => pappa	0.203794		insulin => junb	0.139597
mitochondrial morphology => cytochrome c oxidase	3.54018		uqcrc2 => anxa2	4.37111		coxiv => akt	0.203794		murf1 => junb	0.139597
uqcrc2 => actn2	3.54018		uqcrc1 => runx1	4.37111		intramyocellular lipid => survival rate	0.232057		uqcrc2 => pgc1α	0.139597
fatigue resistance => myostatin	3.54018		uqcrc2 => cd36	4.37111		uqcrc2 => tnfα	0.232057		pgc1α => junb	0.139597
mfn2 => creatine kinase	3.54018		cd36 => runx1	4.37111		mitochondrial morphology => tnfα	0.232057		crtc2 => junb	0.139597
uqcrc2 => nadh	3.54018		myh7 => runx1	4.37111		survival rate => il6	0.232057		atrogin1 => junb	0.139597
mhc => myostatin	3.54018		opa1 => myf5	4.40565		tnfα => cd28	0.232057		nr4a3 => junb	0.139597
opa1 => capillary density	3.54028		mfn2 => tnf	4.42868		cd36 => myostatin	3.4945		hk2 => junb	0.139597
uqcrc2 => vo2max	3.54801		atrogin1 => met	4.42868		uqcrc2 => ucp3	3.4945		coxiv => murf1	0.139597
vo2max => myostatin	3.54801		tnf => met	4.42868		mmp9 => capillary density	3.4945		uqcrc2 => nr4a3	0.139597
mitochondrial morphology => akt	3.58672		bcl2 => met	4.42868		ucp3 => myostatin	3.4945		ncor1 => junb	0.139597
mitochondrial morphology => uqcrc2	3.65511		runx1 => fgfr4	4.42868		cd68 => collagen type iii	3.518		mitochondrial morphology => insulin	0.139597
nrf2 => cd36	3.79631		lactate dehydrogenase => pax3	4.42868		collagen type iii => myostatin	3.52515		ckmt2 => junb	0.140403
mmp9 => runx1	3.89782		akt => met	4.42868		mmp9 => collagen type iii	3.5323		slc25a25 => cenpf	0.140403
myod => adamts8	4.1959		ast => fgfr4	4.42868		mfn2 => tnf	4.4399		uqcrc2 => ckmt2	0.140403
uqcrc2 => ryr1	4.99402		mg53 => lactate dehydrogenase	4.42868		opa1 => myf5	4.4399		cenpf => junb	0.140403
akt => junb	5.5089		fgfr4 => met	4.42868		atrogin1 => met	4.4399		uqcrc2 => hk2	0.147623
uqcrc2 => erk1/2	5.5089		pparγ => cd44	4.42868		tnf => met	4.4399		uqcrc2 => actn3	0.155649
erk1/2 => junb	5.5089		cd44 => met	4.42868		bcl2 => met	4.4399		opa1 => xirp1	0.155649
uqcrc2 => ncor1	6.11315		coxiv => bcl2	4.42868		runx1 => fgfr4	4.4399		mfn2 => xirp1	0.155649
il6 => cd28	6.18609		pparγ => cdkn2a	4.42868		lactate dehydrogenase => pax3	4.4399		hk2 => glul	0.155649
uqcrc2 => p70s6k	7.74014		myf5 => met	4.42868		akt => met	4.4399		shear force => glul	0.155649
ryr1 => adamts8	8.20876		cdkn2a => met	4.43226		mg53 => lactate dehydrogenase	4.4399		myh4 => glul	0.155649
opa1 => myod	8.29667		il6 => cdkn2a	4.43584		fgfr4 => met	4.4399		myh6 => glul	0.155649
p70s6k => slc7a1	8.56418		nrf2 => glutamate	4.90177		pparγ => cd44	4.4399		mg53 => insulin receptor	0.155649
sirt3 => camk4	8.8923		myeloperoxidase => triglyceride	4.90177		il6 => cdkn2a	4.4399		insulin receptor => glutamate	0.155649
uqcrc2 => sirt3	8.8923		triglyceride => glul	4.90177		cdkn2a => met	4.4399		uqcrc2 => myoz1	0.155649
ncor1 => camk4	8.8923		p70s6k => musk	5.268		cd44 => met	4.4399		actn3 => glul	0.155649
uqcrc2 => fgf21	12.713		il1β => musk	5.268		coxiv => bcl2	4.4399		myoz1 => glul	0.155649
fgf21 => slc7a1	12.713		citrate synthase => musk	5.268		pparγ => cdkn2a	4.4399		xirp1 => glul	0.155649
			rps6 => musk	5.268		myf5 => met	4.4399		opa1 => myh6	0.155649
			uqcrc2 => citrate synthase	5.268		nrf2 => glutamate	4.92345		ldl cholesterol => glutamate	0.155649
			uqcrc2 => rps6	5.268		opa1 => xirp1	4.92345		intramyocellular lipid => ldl cholesterol	0.155649
			ncor1 => pappa	9.72148		ast => lactate	4.92345		nrf2 => shear force	0.155649
			opa1 => il6	12.1401		mfn2 => triglyceride	4.92345		uqcrc2 => myh4	0.164213
			uqcrc2 => mtor	12.7131		uqcrc2 => triglyceride	4.92345		uqcrc2 => crtc2	0.171223
			mtor => slc7a1	12.7131		uqcrc2 => free fatty acids	4.92345		ucp1 => musk	0.172777
						lactate => glutamate	4.92345		neb => musk	0.172777
						opa1 => triglyceride	4.92345		uqcrc2 => p62	0.172777
						pparγ => glutamate	4.92345		p62 => musk	0.172777
						free fatty acids => glul	4.92345		myh4 => musk	0.172777
						xirp1 => glul	4.92345		akt => musk	0.172777
						myeloperoxidase => triglyceride	4.92345		acta1 => musk	0.172777
						triglyceride => glul	4.92345		uqcrc2 => neb	0.172777
									ryr1 => musk	0.172777
									uqcrc2 => acta1	0.172777
									crtc2 => pappa	0.202849
									coxiv => akt	0.202849
									intramyocellular lipid => survival rate	0.232057
									uqcrc2 => tnfα	0.232057
									mitochondrial morphology => tnfα	0.232057
									survival rate => il6	0.232057
									tnfα => cd28	0.232057
									cd36 => myostatin	3.52331
									uqcrc2 => ucp3	3.52331
									ucp3 => myostatin	3.52331
									cidea => myostatin	3.52363
									opa1 => cidea	3.52363
									uqcrc2 => mtor	12.7138
									mtor => slc7a1	12.7138
